# Supplementary material
Source: PubMed Central journal article supplement (PMC3837723)
Supplement: AEM.01504-13_zam999104883so1.pdf [file AEM.01504-13_zam999104883so1.pdf]

**Table S1.** The average mol percentages of individual total dissolved amino acids (TDAA) and total dissolved neutral sugars (TDNS) during the two incubation experiments. Both D- and L-amino acids were included in Asp, Glu, Ser and Ala.

|                            | Exp I |      |      |      |      |      |      |      |      | Exp II |       |      |      |      |      |      |
|----------------------------|-------|------|------|------|------|------|------|------|------|--------|-------|------|------|------|------|------|
|                            | Day   |      |      |      |      |      |      |      |      | Day    |       |      |      |      |      |      |
|                            | 0     | 1    | 2    | 3    | 6    | 10   | 14   | 24   | 60   | 0      | 0.125 | 1    | 3    | 5    | 9    | 36   |
| Mol percentage (%) of TDAA |       |      |      |      |      |      |      |      |      |        |       |      |      |      |      |      |
| Asp                        | 13.0  | 12.5 | 12.5 | 12.4 | 12.9 | 12.9 | 11.9 | 12.2 | 12.6 | 6.4    | 6.7   | 6.8  | 7.1  | 7.2  | 7.2  | 7.0  |
| Glu                        | 9.2   | 7.5  | 7.4  | 7.6  | 8.1  | 8.2  | 7.5  | 7.3  | 7.9  | 7.5    | 7.8   | 7.8  | 7.9  | 7.6  | 7.6  | 7.5  |
| $\beta$ -Ala               | 3.4   | 4.0  | 4.3  | 4.4  | 4.6  | 4.9  | 5.1  | 5.5  | 6.0  | 5.3    | 5.3   | 5.4  | 5.7  | 6.0  | 6.4  | 7.3  |
| GABA                       | 1.3   | 1.4  | 1.3  | 1.2  | 1.3  | 1.2  | 1.0  | 1.0  | 1.2  | 1.7    | 1.8   | 1.9  | 2.1  | 2.0  | 2.1  | 2.3  |
| His                        | 0.7   | 0.4  | 0.4  | 0.5  | 0.3  | 0.3  | 0.8  | 0.8  | 0.7  | 1.4    | 1.3   | 1.2  | 1.2  | 0.9  | 0.8  | 0.8  |
| Arg                        | 4.3   | 3.7  | 3.8  | 4.1  | 3.8  | 3.8  | 3.7  | 3.6  | 3.8  | 5.5    | 5.6   | 6.3  | 5.8  | 5.9  | 5.5  | 4.7  |
| Lys                        | 3.9   | 2.5  | 2.3  | 2.5  | 2.1  | 2.1  | 2.4  | 2.5  | 2.4  | 3.1    | 3.2   | 3.2  | 3.2  | 3.1  | 2.9  | 2.6  |
| Met                        | 0.2   | 0.3  | 0.2  | 0.3  | 0.2  | 0.3  | 0.2  | 0.2  | 0.2  | 0.0    | 0.0   | 0.0  | 0.0  | 0.0  | 0.0  | 0.0  |
| Tyr                        | 1.6   | 1.7  | 1.8  | 1.8  | 1.6  | 1.7  | 1.5  | 1.5  | 1.1  | 1.9    | 1.2   | 1.1  | 1.1  | 1.1  | 0.9  | 0.5  |
| Phe                        | 2.9   | 2.7  | 2.4  | 2.4  | 2.4  | 2.3  | 2.3  | 1.5  | 1.5  | 4.2    | 3.6   | 2.9  | 2.8  | 2.9  | 3.1  | 2.9  |
| Ser                        | 8.0   | 7.9  | 7.8  | 7.9  | 8.0  | 8.1  | 8.4  | 8.4  | 8.4  | 8.1    | 7.1   | 7.2  | 7.0  | 7.7  | 8.0  | 8.2  |
| Thr                        | 7.7   | 7.5  | 7.7  | 7.4  | 7.5  | 7.3  | 7.3  | 7.3  | 6.5  | 6.8    | 7.1   | 6.9  | 7.2  | 7.1  | 7.0  | 7.4  |
| Gly                        | 16.2  | 17.6 | 18.1 | 18.6 | 19.4 | 19.9 | 22.3 | 22.0 | 22.8 | 20.0   | 20.5  | 20.2 | 20.7 | 21.1 | 21.7 | 23.8 |
| Ala                        | 11.8  | 16.2 | 16.1 | 14.6 | 14.1 | 13.8 | 14.1 | 14.2 | 13.5 | 9.6    | 10.1  | 10.5 | 11.3 | 10.7 | 10.7 | 10.6 |
| Val                        | 6.4   | 6.7  | 7.0  | 7.2  | 7.4  | 7.1  | 6.0  | 6.3  | 6.1  | 6.7    | 6.6   | 6.9  | 6.0  | 6.0  | 6.0  | 5.9  |
| Ileu                       | 4.4   | 3.4  | 3.1  | 2.8  | 2.4  | 2.3  | 2.3  | 2.2  | 2.0  | 5.0    | 5.1   | 4.8  | 4.8  | 4.5  | 4.5  | 4.7  |
| Leu                        | 5.0   | 3.9  | 3.8  | 4.2  | 4.0  | 3.8  | 3.3  | 3.3  | 3.4  | 6.8    | 6.8   | 6.9  | 6.2  | 6.3  | 5.5  | 3.7  |
| Mol percentage (%) of TDNS |       |      |      |      |      |      |      |      |      |        |       |      |      |      |      |      |
| Fuc                        | 20.3  | 19.0 | 19.7 | 19.2 | 19.5 | 19.4 | 18.2 | 18.2 | 18.9 | 15.0   | 14.0  | 15.2 | 16.9 | 17.8 | 17.6 | 15.9 |
| Rha                        | 8.9   | 9.6  | 9.4  | 9.4  | 9.5  | 9.2  | 10.6 | 11.4 | 11.6 | 11.9   | 11.6  | 10.9 | 13.5 | 15.2 | 14.2 | 14.5 |
| Ara                        | 14.5  | 14.9 | 14.8 | 14.9 | 14.7 | 14.6 | 13.5 | 12.9 | 12.3 | 11.0   | 10.1  | 10.8 | 12.9 | 13.2 | 13.3 | 13.7 |
| Gal                        | 16.2  | 15.1 | 15.0 | 15.8 | 15.7 | 17.6 | 15.3 | 14.8 | 14.9 | 21.4   | 15.6  | 14.9 | 14.9 | 15.2 | 15.0 | 15.1 |
| Glu                        | 9.3   | 8.9  | 9.2  | 9.2  | 9.0  | 9.5  | 6.4  | 7.3  | 8.1  | 19.5   | 28.6  | 26.9 | 17.4 | 14.0 | 14.2 | 13.9 |
| Man                        | 16.0  | 17.3 | 16.9 | 16.8 | 16.5 | 15.4 | 20.1 | 19.3 | 18.1 | 13.9   | 13.2  | 14.1 | 15.8 | 16.4 | 17.0 | 18.1 |
| Xys                        | 20.3  | 19.0 | 19.7 | 19.2 | 19.5 | 19.4 | 18.2 | 18.2 | 18.9 | 15.0   | 14.0  | 15.2 | 16.9 | 17.8 | 17.6 | 15.9 |
